RESEARCH ARTICLE

# Comparison of FIB-4 and transient elastography in evaluating liver fibrosis of chronic hepatitis C subjects in community

Pin-Nan Cheng<sup>1\*</sup>, Hung-Chih Chiu<sup>1</sup>, Yen-Cheng Chiu<sup>1</sup>, Shu-Chuan Chen<sup>2</sup>, Yi Chen<sup>2</sup>

**1** Division of Gastroenterology and Hepatology, Department of Internal Medicine, National Cheng Kung University Hospital, College of Medicine, National Cheng Kung University, Tainan, Taiwan, **2** Public Health Bureau, Tainan City Government, Tainan, Taiwan

\* [pncheng@mail.ncku.edu.tw](mailto:pncheng@mail.ncku.edu.tw)

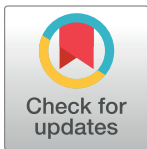

**OPEN ACCESS**

**Citation:** Cheng P-N, Chiu H-C, Chiu Y-C, Chen S-C, Chen Y (2018) Comparison of FIB-4 and transient elastography in evaluating liver fibrosis of chronic hepatitis C subjects in community. PLoS ONE 13(11): e0206947. <https://doi.org/10.1371/journal.pone.0206947>

**Editor:** Chen-Hua Liu, National Taiwan University Hospital, TAIWAN

**Received:** August 22, 2018

**Accepted:** October 21, 2018

**Published:** November 7, 2018

**Copyright:** © 2018 Cheng et al. This is an open access article distributed under the terms of the [Creative Commons Attribution License](https://creativecommons.org/licenses/by/4.0/), which permits unrestricted use, distribution, and reproduction in any medium, provided the original author and source are credited.

**Data Availability Statement:** All relevant data are within the manuscript and its Supporting Information files.

**Funding:** The study was financially supported by the CHENG-HSING Medical Foundation of National Cheng Kung University Hospital.

**Competing interests:** The authors have declared that no competing interests exist.

**Abbreviations:** HCV, hepatitis C virus; DAA, direct acting antiviral; CHC, chronic hepatitis C; TE,

## Abstract

### Background and aim

The role of non-invasive methods to evaluate fibrosis severity of chronic hepatitis C (CHC) subjects in community needs to be explored. This study investigated FIB-4 and transient elastography (TE) in staging liver fibrosis of CHC subjects in community.

### Methods

A total of 905 subjects who were positive for anti-HCV antibody from five districts of Tainan City of Taiwan were invited to participate in surveillance activities for CHC. FIB-4 and TE were measured for each participant.

### Results

A total of 502 subjects with detectable HCV RNA and valid TE were enrolled. The distribution of FIB-4 and TE values differed markedly. Both methods exhibited a strongest correlation in subjects with at age 50~60 years ( $r = 0.655$ ,  $p < 0.001$ ). FIB-4 score increased proportionally with age ( $p < 0.001$ ), but TE did not ( $p = 0.142$ ). The intraclass correlation coefficient of both methods was 0.255 ( $p < 0.001$ ). Subjects with TE defined advanced fibrosis exhibited younger age, higher BMI, higher platelet count, lower FIB-4 score, higher incidence of fatty liver and splenomegaly, and higher controlled attenuation parameter value than those defined by FIB-4. By multivariate logistic regression analysis, higher ALT levels, higher incidence of fatty liver, and presence of splenomegaly were the independent factors associated with advanced fibrosis defined by TE rather than defined by FIB-4.

### Conclusions

FIB-4 and TE defined different distribution of fibrosis stages in same HCV population. FIB-4 was deeply influenced by age whereas TE was not. TE had the advantages over than FIB-4 in strong association with splenomegaly and in detecting the role of non-alcoholic fatty liver disease in advanced fibrosis.

transient elastography; AST, aspartate aminotransferase; ALT, alanine aminotransferase; CAP, controlled attenuation parameter.

## Introduction

More than 170 million people are infected with hepatitis C virus (HCV). Chronic HCV infection leads to the development of chronic hepatitis, liver cirrhosis and associated complications, hepatocellular carcinoma, and liver-related mortality [1–3]. Treatment to eradicate HCV provides benefits with respect to both liver-related or extrahepatic morbidity and mortality [4]. In era of pegylated interferon/ribavirin, barriers to treatment include fear of the side effects of drugs, ineligibility for treatment, intolerance of treatment, and others [5]. Direct acting antiviral (DAA) therapy is a more efficacious, shorter-duration, and well-tolerated treatment without most of the barriers to treatment by pegylated interferon/ribavirin therapy [6,7].

Patients with CHC and advanced fibrosis have a higher incidence of cirrhosis-related complications and are more likely to need a liver transplant [8–10]. In cases of advanced fibrosis, the benefits of antiviral treatment are observed after HCV has been eradicated [11,12]. Hence, identifying CHC patients with advanced fibrosis is clinically important for prioritizing treatment. Ideally, all CHC patients should be treated. However, the huge economic burden on care providers or the government makes this ideal goal difficult to achieve. A strategy for treating CHC patients sequentially in a manner that accounts for the severity of liver fibrosis is reasonable, evidence-based, and suggested in the EASL HCV treatment guidelines [13]. The two widely used non-invasive methods for identifying and classifying a stage of fibrosis are FIB-4 and the measurement of liver stiffness by transient elastography (TE). FIB-4 has been demonstrated to have high negative and positive predictive rates of advanced fibrosis [14]. The measurement of liver stiffness by transient elastography is quite different from FIB-4 and depends on a vibration-generating machine to apply vibrations to the liver and then obtain the propagation velocity of shear wave [15]. Based on the fundamental difference between the FIB-4 and TE methods, analyzing the features of a CHC population with various stages of fibrosis is of interest.

In Tainan City, hepatitis B virus and HCV infections are endemic [16,17]. The application of non-invasive methods, such as FIB-4 and TE, to evaluate the severity of fibrosis in HCV subjects is an important first step in referral for DAA treatment. Understanding the advantages and limitations of FIB-4 and TE is required for further and future applications in community.

This community-based study used FIB-4 and TE to evaluate the severity of liver fibrosis, especially advanced fibrosis, and to analyze the characteristics of CHC subjects.

## Materials and methods

### Surveillance activities of CHC

Since 2017, the National Institute of Health of the government of Taiwan has been reimbursing DAA therapy for CHC. Only patients with advanced fibrosis stage 3 or stage 4 which was defined by histological evaluation, by TE (with liver stiffness  $\geq 9.5$  kPa; Echosense, France), or by FIB-4 score  $> 3.25$  were qualified for DAA treatment. To identify subjects that satisfy the conditions for the reimbursement of DAA therapy for CHC in community, surveillance activities were conducted in cooperation with the Public Health Bureau of the Tainan City Government in the five districts of Tainan City (Rein-De, Jiang-Chun, Qui-Ren, Hsin-Hwa, and Liuo-Jia). Before surveillance activity, candidate of subjects were informed in detail about the surveillance activities, including their dates, locations, and items of examination, and required information by officials of the health departments of local districts and the Tainan City Government. The items of surveillance activity included baseline characteristics, measurement of body weight/body height/waist circumference, blood tests, abdominal sonography, and measurement of liver stiffness by TE. The Research Ethics Committees of National Cheng Kung University Hospital approved this study, which was carried out according to the guidelines of

the International Conference on Harmonization for Good Clinical Practice. All patients provided written informed consent before participation.

## Patients

In the past ten years, the Tainan City government has performed screening activities for viral hepatitis in all districts of Tainan City. Subjects participated in a screening program from January 2015 to January 2018 in the five districts and those who were positive for anti-HCV antibody were the target population.

## Examinations

Blood samples were collected and stored at  $-70^{\circ}\text{C}$  until testing. The blood tests included aspartate aminotransferase (AST), alanine aminotransferase (ALT), complete blood counts, quantitation of HCV RNA, and genotyping of HCV in HCV RNA-positive cases. Quantitation and genotyping of HCV RNA were performed using the real-time polymerase chain reaction (Abbott RealTime HCV quantitative assay; Abbott Molecular Inc., IL, USA). Genotypes of HCV were also using the real-time polymerase chain reaction (RealTime HCV Genotype II; Abbott Molecular Inc., IL, USA). Fatty liver in sonography was defined as the presence of liver-renal echo contrast and bright liver [18] whereas splenomegaly was defined as the superior to the inferior axis of spleen more than 13 cm [19]. Liver stiffness was measured by TE, as reported elsewhere [20]. Briefly, each patient lied in the supine position with his or her right hand raised and trunk bent to the left to maximize the right intercostal space. TE was performed by three physicians (HCC, PNC, and YCC) who each had experience of at least 500 measurements. The vibration wave of an M probe was generated and the liver stiffness and controlled attenuation parameter (CAP) were obtained in kPa and dB/m, respectively. Valid liver stiffness was identified by at least ten consecutive measurements with an interquartile range/median of kPa of less than 30% with an interquartile range of CAP of less than 40dB/m. The FIB-4 score of each participant was calculated using the equation,  $\text{FIB-4} = [\text{Age (years)} \times \text{AST (U/L)}] / [\text{platelet (} 10^9/\text{L)} \times \sqrt{\text{ALT (U/L)}}]$ . Stages of fibrosis were defined as follows; a FIB-4 score  $> 3.25$  or TE value  $\geq 9.5$  kPa for advanced fibrosis and a FIB-4 score  $\leq 3.25$  or a TE value  $< 9.5$  kPa for non-advanced fibrosis. Furthermore, lowest cutoff values of non-advanced fibrosis were set as a FIB-4 score of 1.45 or a TE value of 7.1kPa [14,15].

## Statistical analysis

Data were expressed as mean plus standard deviation or percentage. The correlation between FIB-4 scores and TE values was evaluated. One way ANOVA or the Kruskal–Wallis test was used to compare continuous variables among stages of fibrosis based on FIB-4 score alone, TE alone, and combined FIB-4 score/TE, to compare FIB-4 and TE by different age groups, and to compare the characteristics of subjects among FIB-4 or TE groups where appropriate. Multivariate logistic regression analysis was performed to search factors that were associated with advanced fibrosis defined by TE or FIB-4. Intraclass correlation coefficient was used to evaluate the reliability of FIB-4 and TE in evaluating fibrosis stages. All tests were two-tailed. A p value of less than 0.05 was considered to indicate statistical significance. Finally, data handling and analysis were carried out using SPSS software for Windows, version 17.0 (SPSS Inc., Chicago, IL).

## Results

### 1. Patients

A total of 905 who were positive for anti-HCV antibody voluntarily participated in surveillance activities. Following the exclusion of 401 subjects with undetectable HCV RNA and two

subjects without valid liver stiffness measurement could be obtained, 502 subjects with detectable HCV RNA were enrolled in this investigation. Table 1 presents the baseline characteristics of the enrolled patients. They were predominantly female (62.2%) and genotype 2 was prevalent (50.6%).

## 2. Liver fibrosis staging

The distributions of liver fibrosis among the same enrolled subjects that were determined from FIB-4 score and TE differed markedly (Fig 1). FIB-4 scores were <1.45 for 124 subjects (24.7%), between 1.45 and 3.25 for 290 subjects (57.8%), and  $\geq 3.25$  for 88 subjects (17.5%). TE scores were <7.1kPa for 337 subjects (67.1%), 7.1~9.5 kPa for 63 subjects (12.6%), and >9.5 kPa for 102 subjects (20.3%).

Subjects fell into four age groups, which were <50 years, 50~60 years, 60~70 years, and >70 years. Moderate correlations between FIB-4 and TE among all subjects and among subjects in each age group were observed (Table 2). The strongest correlation was observed in subjects with ages 50~60 years ( $r = 0.655$ ,  $p < 0.001$ ). Intraclass correlation efficient between FIB-4 and TE was 0.255 ( $p < 0.001$ ) that indicated the reliability of two methods was fair. Fig 2 demonstrates that the FIB-4 score increased proportionally with ages ( $p < 0.001$ ), but liver stiffness, measured by TE, did not ( $p = 0.142$ ). Spots distribution of FIB-4 and TE according age groups were also different (S1 and S2 Figs).

## 3. Comparisons of FIB-4 score with liver stiffness as determined by TE

A total of 152 subjects were classified into advanced fibrosis, as determined by either FIB-4 or TE, and were divided into three independent groups based on scoring methods of advanced fibrosis. They were FIB-4 (46 subjects), combined FIB-4/TE (43 subjects), and TE groups (63 subjects). The concordance rate of the two methods was 43/152 (28.3%) for advanced fibrosis.

**Table 1. Baseline characteristics of 502 HCV viremic subjects.**

| Variable                             |              |
|--------------------------------------|--------------|
| Age (years)                          | 64.2 ± 9.9   |
| Female/Male                          | 312/190      |
| Body mass index (kg/m <sup>2</sup> ) | 24.8 ± 4.1   |
| HCV RNA (log <sub>10</sub> IU/mL)    | 5.5 ± 1.3    |
| HCV genotype                         |              |
| 1a                                   | 41           |
| 1b                                   | 105          |
| 2                                    | 254          |
| 3                                    | 2            |
| 6                                    | 77           |
| Mixed                                | 8            |
| Undetermined                         | 15           |
| AST (U/L)                            | 43.8 ± 32.6  |
| ALT (U/L)                            | 46.0 ± 41.3  |
| Hemoglobin (g/dL)                    | 13.7 ± 1.5   |
| Platelet count (x10 <sup>9</sup> /L) | 198.3 ± 61.7 |
| FIB-4 score                          | 2.5 ± 1.9    |
| Live stiffness (kPa)                 | 7.9 ± 6.2    |

Mixed genotype: genotype 1+2: 1; 1a+1b: 1; 1b+2: 5; 4+6: 1.

<https://doi.org/10.1371/journal.pone.0206947.t001>

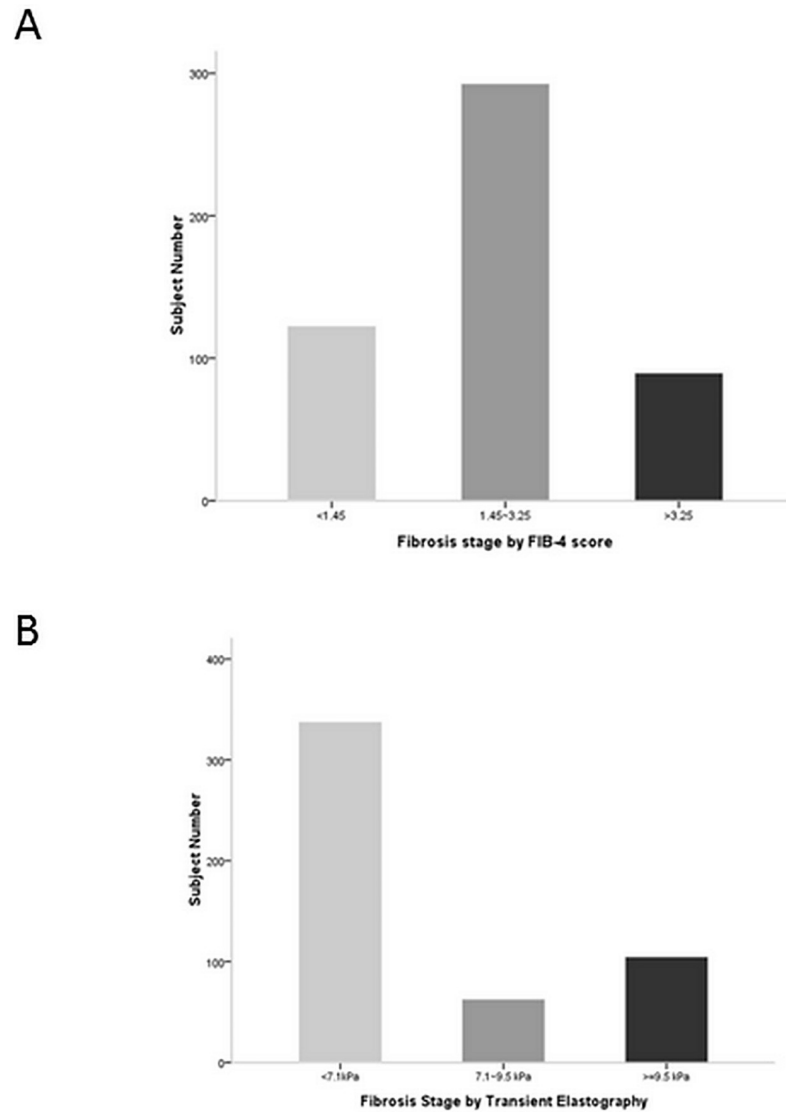

**Fig 1. Fibrosis distribution.** Fibrosis distribution of fibrosis severity according to (A) FIB-4 score or (B) Transient elastography.

<https://doi.org/10.1371/journal.pone.0206947.g001>

Sixty-three subjects (41.4%) would not have been identified as such if the FIB-4 score had been used alone. Similarly, the advanced fibrosis of 46 subjects (30.3%) would have been missed by using only TE. The univariate analysis revealed that subjects with advanced fibrosis in the TE group were younger, had higher platelet counts, higher body mass index (BMI), higher incidence of fatty liver, higher CAP values, higher incidence of splenomegaly, and lower FIB-4

**Table 2. Correlation of FIB-4 and TE by age.**

|             | All    | <50 years | 50~60 years | 60~70 years | >70 years |
|-------------|--------|-----------|-------------|-------------|-----------|
| Subject No. | 502    | 43        | 123         | 197         | 139       |
| Coefficient | 0.458  | 0.412     | 0.655       | 0.346       | 0.502     |
| p values    | <0.001 | 0.006     | <0.001      | <0.001      | <0.001    |

<https://doi.org/10.1371/journal.pone.0206947.t002>

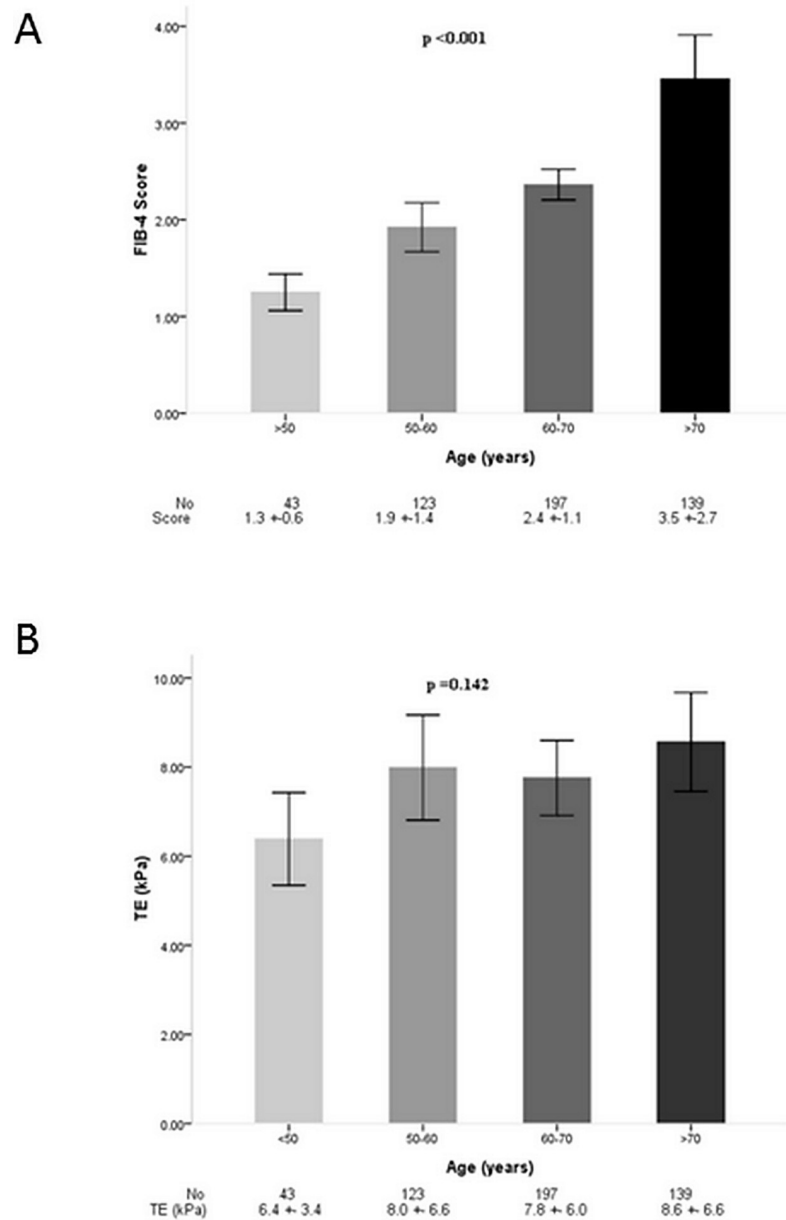

**Fig 2. Fibrosis distribution of FIB-4 and TE according to age groups.** Bar indicates mean values and lines indicated 95% of confidence interval. (A) FIB-4 distribution by age groups; (B) TE distribution by age groups.

<https://doi.org/10.1371/journal.pone.0206947.g002>

scores (Table 3). Combined FIB-4/TE identified subjects with more severe liver diseases that were associated with higher liver stiffness and higher FIB-4 scores. Multivariate logistic regression analysis was performed to identify factors that were associated with the difference of FIB-4 and TE in advanced fibrosis subjects. Among the significant factors in univariate analysis, higher level of AST (odds ratio: 1.055, 95% CI: 1.008~1.015,  $p = 0.022$ ), presence of fatty liver (odds ratio: 3.711, 95% CI: 1.079~12.758,  $p = 0.037$ ), and presence of splenomegaly (odds ratio: 14.205, 95% CI: 2.598~77.678,  $p = 0.002$ ) were the three independent factors associated with TE defined advanced fibrosis rather than FIB-4 defined advanced fibrosis.

**Table 3. Comparisons of characteristics of fibrosis stages by FIB-4 or transient elastography.**

| Fibrosis stages*                     | FIB-4        | FIB-4/TE     | TE           | p value |
|--------------------------------------|--------------|--------------|--------------|---------|
| <b>Advanced fibrosis</b>             |              |              |              |         |
| Subject number                       | 46           | 43           | 63           |         |
| Gender (female/male)                 | 25/24        | 24/19        | 39/24        | 0.694   |
| Age (years)                          | 73.3 ± 7.2   | 70.4 ± 9.7   | 63.5 ± 8.9   | <0.001  |
| Body mass index (kg/m <sup>2</sup> ) | 24.1 ± 3.8   | 24.3 ± 3.5   | 26.3 ± 4.0   | 0.003   |
| Waist circumference (cm)             | 81.2 ± 12.5  | 85.0 ± 17.0  | 86.2 ± 12.2  | 0.175   |
| AST (U/L)                            | 57.7 ± 33.6  | 93.9 ± 72.4  | 43.9 ± 17.3  | <0.001  |
| ALT (U/L)                            | 59.0 ± 53.1  | 87.1 ± 86.8  | 50.2 ± 31.1  | 0.008   |
| Platelet (10 <sup>3</sup> u/L)       | 135.7 ± 29.6 | 134.8 ± 43.1 | 205.3 ± 72.4 | <0.001  |
| Liver stiffness (kPa)                | 6.4 ± 1.6    | 19.1 ± 9.8   | 14.6 ± 8.0   | <0.001  |
| CAP (dB/m)                           | 229.7 ± 40.4 | 230.1 ± 37.1 | 261.1 ± 52.2 | <0.001  |
| FIB-4 score                          | 4.3 ± 0.8    | 6.0 ± 4.2    | 2.1 ± 0.7    | <0.001  |
| Fatty liver (yes/no)                 | 8/38         | 13/30        | 36/27        | <0.001  |
| Splenomegaly (yes/no)                | 2/44         | 15/21        | 11/52        | 0.011   |
| Genotype                             |              |              |              | 0.116   |
| 1a                                   | 4            | 1            | 3            |         |
| 1b                                   | 10           | 11           | 21           |         |
| 2                                    | 24           | 25           | 28           |         |
| 3                                    | 0            | 2            | 0            |         |
| 6                                    | 8            | 4            | 6            |         |
| 1b+2                                 | 0            | 0            | 2            |         |
| <b>Non-advanced fibrosis</b>         |              |              |              |         |
| Subject number                       | 62           | 352          | 46           |         |
| Gender (female/male)                 | 38/24        | 225/127      | 25/21        | 0.439   |
| Age (years)                          | 62.9 ± 9.2   | 62.5 ± 9.5   | 73.3 ± 7.2   | <0.001  |
| Body mass index (kg/m <sup>2</sup> ) | 26.3 ± 4.0   | 24.5 ± 4.1   | 24.1 ± 3.8   | 0.005   |
| Waist circumference (cm)             | 86.1 ± 12.2  | 83.0 ± 41.1  | 81.3 ± 12.5  | 0.768   |
| AST (U/L)                            | 46.6 ± 27.5  | 35.8 ± 17.3  | 57.7 ± 33.6  | <0.001  |
| ALT (U/L)                            | 51.9 ± 33.4  | 38.5 ± 26.8  | 59.0 ± 53.1  | <0.001  |
| Platelet (10 <sup>3</sup> u/L)       | 205.6 ± 72.7 | 213.1 ± 54.3 | 135.7 ± 29.6 | <0.001  |
| Liver stiffness (kPa)                | 14.8 ± 8.0   | 5.6 ± 1.4    | 6.4 ± 1.6    | <0.001  |
| CAP (dB/m)                           | 260.7 ± 52.6 | 237.2 ± 45.2 | 229.7 ± 40.4 | <0.001  |
| FIB-4 score                          | 2.1 ± 0.7    | 1.9 ± 0.6    | 4.3 ± 0.8    | <0.001  |
| Fatty liver (yes/no)                 | 36/26        | 153/199      | 8/38         | <0.001  |
| Splenomegaly (yes/no)                | 11/52        | 12/340       | 2/44         | <0.001  |
| Genotype                             |              |              |              | 0.262   |
| 1a                                   | 3            | 33           | 4            |         |
| 1b                                   | 20           | 64           | 10           |         |
| 2                                    | 27           | 178          | 24           |         |
| 3                                    | 1            | 0            | 0            |         |
| 6                                    | 6            | 59           | 8            |         |
| 1+2                                  | 2            | 4            | 0            |         |
| 4+6                                  | 0            | 1            | 0            |         |
| Undetermined                         | 3            | 12           | 0            |         |

\* Advanced fibrosis: FIB-4 >3.25 and/or TE ≥9.5 kPa; Non-advanced fibrosis: FIB-4 ≤3.25 and/or TE <9.5 kPa.

Abbreviations: AST, aspartate aminotransferase; ALT, alanine aminotransferase; TE, transient elastography; CAP, controlled attenuation parameter.

<https://doi.org/10.1371/journal.pone.0206947.t003>

**Table 4. Comparisons of characteristics of fibrosis stages by transient elastography.**

| Variables                            | Fibrosis Stages |                |              | p values |
|--------------------------------------|-----------------|----------------|--------------|----------|
|                                      | TE <7.1 kPa     | TE 7.1~9.5 kPa | TE ≥9.5 kPa  |          |
| Subject number                       | 337             | 63             | 102          |          |
| Gender (female/male)                 | 211/126         | 40/23          | 61/41        | 0.853    |
| Age (years)                          | 63.7 ± 9.8      | 64.5 ± 10.6    | 66.0 ± 9.8   | 0.116    |
| Body mass index (kg/m <sup>2</sup> ) | 24.5 ± 4.1      | 24.5 ± 3.8     | 25.5 ± 3.9   | 0.101    |
| Waist circumference (cm)             | 80.8 ± 10.8     | 81.6 ± 10.5    | 84.8 ± 11.2  | 0.004    |
| AST (U/L)                            | 36.5 ± 20.5     | 48.2 ± 21.1    | 64.8 ± 54.6  | <0.001   |
| ALT (U/L)                            | 38.4 ± 29.6     | 54.7 ± 37.8    | 65.9 ± 63.6  | <0.001   |
| Platelet (10 <sup>3</sup> u/L)       | 207.0 ± 57.5    | 188.5 ± 55.4   | 176.0 ± 72.1 | <0.001   |
| HCV RNA (log <sub>10</sub> IU/mL)    | 5.5 ± 1.3       | 5.6 ± 1.2      | 5.4 ± 1.3    | 0.555    |
| FIB-4 score                          | 2.1 ± 1.0       | 2.6 ± 1.2      | 3.7 ± 3.4    | <0.001   |
| FIB-4: >3.25, n (%)                  | 32 (9.5)        | 15 (23.8)      | 41 (40.2)    |          |
| FIB-4: 1.45~3.25, n (%)              | 205 (60.8)      | 35 (55.6)      | 50 (49.0)    |          |
| FIB-4: <1.45, n (%)                  | 100 (29.7)      | 13 (20.6)      | 11 (10.8)    |          |
| Fatty liver (yes/no)                 | 139/198         | 25/38          | 47/55        | 0.633    |
| CAP (dB/m)                           | 234.7 ± 44.1    | 245.1 ± 46.7   | 248.4 ± 49.7 | 0.015    |
| Splenomegaly (yes/no)                | 12/325          | 2/60           | 11/50        | <0.001   |

<https://doi.org/10.1371/journal.pone.0206947.t004>

For non-advanced fibrosis, the concordance rate between FIB-4 and TE was 76.5% (352/460). Subjects with non-advanced fibrosis in the TE group exhibited older, lighter BMI, lower platelet counts, lower TE and CAP values, higher FIB-4 scores, and lower incidence of fatty liver.

Fibrosis severity was categorized into three stages by TE values (Table 4). In TE defined advanced fibrosis, only 40.2% of subjects had FIB-4 >3.25. Among three groups, age, body mass index, HCV viral loads, and incidence of fatty liver were similar. As TE defined fibrosis stage progressed, significantly higher AST and ALT, higher waist circumference, lower platelet counts, higher FIB-4 score, higher CAP values, and higher incidence of splenomegaly were observed. The higher incidence of fatty liver and higher CAP values mainly observed in TE defined advanced fibrosis subjects with FIB-4 <1.45 (S1 Table).

## Discussion

In this investigation, FIB-4 and TE were utilized to determine the stages of fibrosis in a same CHC population in community. FIB-4 and TE yielded different patterns of the fibrosis distributions in the same population. The concordance rate of the two methods was low in diagnosis of advanced fibrosis. The characteristics of the subjects that were identified by FIB-4 and TE differed greatly. These results indicate that these two methods are not interchangeable and should be used clinically with care.

FIB-4 and TE yielded different distributions of the severity of fibrosis in a single study population. The measurement of liver stiffness by TE is based on machine-induced vibration that is barely affected by age. However, ALT level may affect the performance of TE [21, 22]. In this investigation, enrolled subjects exhibited low ALT levels (46.0 ± 41.3 U/L) that minimize the ALT effects on TE. The other factor that would affect TE performance is the presence of steatosis or fatty liver [23,24]. In this investigation, among three TE defined fibrosis stages, higher CAP values as fibrosis stages became severe, especially in those subjects with FIB-4 <1.45 in TE defined advanced fibrosis. These results indicated the possible role of steatosis in the measurement of liver stiffness by TE, especially combined with low FIB-4 score subjects.



Liver biopsy is currently the gold standard clinical method for evaluating fibrosis stage. However, liver histological evaluations cannot be performed in the community. Non-invasive methods, such as FIB-4 and TE, are easier to perform than a liver biopsy and can be instantly interpreted. Vallet-Pichard et al. found that FIB-4 had positively predicted advanced fibrosis with 82.1% concordance with liver biopsy results [14]. Similarly, a study that compared TE with liver biopsy found that the former had a high rate of positive prediction of advanced fibrosis (49) [15]. However, the findings by FIB-4 and TE of advanced fibrosis were concordant for only 28.3% of CHC subjects in this study. Age severely influenced FIB-4 score, but not TE. The mean age ( $64.2 \pm 9.9$  years) of the subjects in this study exceeded that in the study of Vallet-Pichard et al. ( $44 \pm 12$  years). About 70% of enrolled subjects were older than 60 years in this investigation. The subjects who were diagnosed with advanced fibrosis by FIB-4 were older than those diagnosed with by TE ( $73.3 \pm 7.2$  years vs.  $63.5 \pm 8.9$  years,  $p < 0.001$ ). Greater age is not necessarily associated with more severe fibrosis and is an important factor in the failure of FIB-4 calculations [14]. In this investigation, about 60% of the cases of advanced fibrosis that were identified using TE had FIB-4 score  $\leq 3.25$ . Presence of splenomegaly did associate with TE-defined advanced fibrosis rather than FIB-4 defined advanced fibrosis. The correlation between FIB-4 and TE was greatest for participants of ages 50~60 years. All of these results suggest that age is an important determinant of FIB-4 score but not TE, and FIB-4 calculations should be cautiously used to evaluate the stage of fibrosis in subjects older than 60 years. In addition, TE has been proved to be effective for predicting the long-term outcomes of CHC [25]. Lines of evidence showed that some extrahepatic factors including obesity, impaired glucose metabolism, and steatosis accelerate disease progression of CHC [26–29]. Presence of fatty liver was strongly associated with TE-defined advanced fibrosis rather than FIB-4 defined advanced fibrosis. In those subjects with TE defined advanced fibrosis, higher CAP values and increased incidence of fatty liver was observed in subjects FIB-4  $< 1.45$  indicated that TE may have the advantage over than FIB-4 to detect the involvement of non-alcoholic fatty liver disease in fibrosis progression of chronic hepatitis C. TE is probably better than FIB-4 for evaluating liver fibrosis in CHC subjects in community.

Potential limitations of this study should be addressed. First, all comparisons were performed based on defined cutoff values of the non-invasive methods, not based on liver histology. Second, the clinical significance of intermediate FIB-4 scores or TE values seems to be inconclusive according to current evidence [14,15]. Third, detail medical histories, covering diabetes mellitus, dyslipidemia, and lipid or sugar profiles, were not obtained. Any potential association between fatty liver and CAP ~~in subjects with advanced or mild fibrosis~~ could not be analyzed in this community-based study.

In summary, FIB-4 and TE defined different fibrosis stages in the same CHC population in community. Age deeply affected the FIB-4 evaluation. TE had the advantages over than FIB-4 in strong association with splenomegaly and in detecting the contributing role of non-alcoholic fatty liver disease in subjects with advanced fibrosis.

## Supporting information

### S1 File. Date set in SPSS format.

(SAV)

### S1 Table. Characteristics of subjects with different ranges of FIB-4 scores in defined fibrosis stages by TE.

(DOCX)

### S1 Fig. The scatter plot of FIB-4.

(TIF)

**S2 Fig. The scatter plot of TE.**  
(TIF)

## Acknowledgments

The authors would like to thank all of the subjects who participated in this study and staffs including nursing staffs and volunteers who assisted surveillance activities.

## Author Contributions

**Conceptualization:** Pin-Nan Cheng.

**Formal analysis:** Pin-Nan Cheng.

**Investigation:** Pin-Nan Cheng, Hung-Chih Chiu, Yen-Cheng Chiu, Shu-Chuan Chen.

**Methodology:** Pin-Nan Cheng, Hung-Chih Chiu, Yen-Cheng Chiu, Shu-Chuan Chen, Yi Chen.

**Project administration:** Pin-Nan Cheng, Hung-Chih Chiu, Yen-Cheng Chiu, Shu-Chuan Chen, Yi Chen.

**Software:** Pin-Nan Cheng.

**Supervision:** Pin-Nan Cheng, Yi Chen.

**Validation:** Hung-Chih Chiu, Yen-Cheng Chiu.

**Writing – original draft:** Pin-Nan Cheng.

## References

1. Thein HH, Yi QL, Dore GJ, Krahn MD. Estimation of stage-specific fibrosis progression rates in chronic hepatitis C virus infection: a meta-analysis and meta-regression. *Hepatology* 2008; 48: 418–431. <https://doi.org/10.1002/hep.22375> PMID: 18563841
2. Westbrook RH, Dusheiko G. Natural history of hepatitis C. *J Hepatol.* 2014; 61 Suppl; S58–68.
3. Poynard T, Bedossa P, Opolon P. Natural history of liver fibrosis progression in patients with chronic hepatitis C. *Lancet* 1997; 349: 825–832. PMID: 9121257
4. Negro F, Forton D, Craxi A, Sulkowski MS, Feld JJ, Manns MP. Extrahepatic morbidity and mortality of chronic hepatitis C. *Gastroenterology* 2015; 149: 1345–1360. <https://doi.org/10.1053/j.gastro.2015.08.035> PMID: 26319013
5. Yu ML, Yeh ML, Tsai PC, Huang CI, Huang JF, Huang CF, et al. Huge gap between clinical efficacy and community effectiveness in the treatment of chronic hepatitis C: a nationwide survey in Taiwan. *Medicine* 2015; 94: e690. <https://doi.org/10.1097/MD.0000000000000690> PMID: 25837762
6. Curry MP, Tapper EB, Bacon B, Dieterich D, Flamm SL, Guest L, et al. Effectiveness of 8- or 12-weeks of ledipasvir and sofosbuvir in real-world treatment-naïve, genotype 1 hepatitis C infected patients. *Aliment Pharmacol Ther* 2017; 46: 540–548. <https://doi.org/10.1111/apt.14204> PMID: 28691377
7. Gane EJ, Pianko S, Roberts SK, Thompson AJ, Zeuzem S, Zuckerman E, et al. Safety and efficacy of an 8-week regimen of grazoprevir plus sofosbuvir plus velpatasvir compared with grazoprevir plus sofosbuvir plus velpatasvir in participants without cirrhosis infected with hepatitis C virus genotypes 1, 2, or 3 (C-CREST-1 and C-CREST-2, part A): two randomised, phase 2, open-label trials. *Lancet Gastroenterol Hepatol* 2017. [https://doi.org/10.1016/S2468-1253\(17\)30159-0](https://doi.org/10.1016/S2468-1253(17)30159-0)
8. Dienstag JL, Ghany MG, Morgan TR, Di Bisceglie AM, Bonkovsky HL, Kim HY, et al. A prospective study of the rate of progression in compensated, histologically advanced chronic hepatitis C. *Hepatology* 2011; 54: 396–405. <https://doi.org/10.1002/hep.24370> PMID: 21520194
9. Everhart JE, Wright EC, Goodman ZD, Dienstag JL, Hoefs JC, Kleiner DE, et al. Prognostic value of Ishak fibrosis stage: findings from the hepatitis C antiviral long-term treatment against cirrhosis trial. *Hepatology* 2010; 51: 585–594. <https://doi.org/10.1002/hep.23315> PMID: 20101752

10. Sangiovanni A, Prati GM, Fasani P, Ronchi G, Romeo R, Manini M, et al. The natural history of compensated cirrhosis due to hepatitis C virus: a 17-year cohort study of 214 patients. *Hepatology* 2006; 43: 1303–1310. <https://doi.org/10.1002/hep.21176> PMID: 16729298
11. Bruno S., Di Marco V., Iavarone M., Roffi L., Crosignani A., Calvaruso V., et al. Survival of patients with HCV cirrhosis and sustained virologic response is similar to the general population *J Hepatol* 2016; 64: 1217–1223. <https://doi.org/10.1016/j.jhep.2016.01.034> PMID: 27059129
12. van der Meer A.J., Veldt B.J., Feld J.J., Wedemeyer H., Dufour J.F., Lammert F., et al. Association between sustained virological response and all-cause mortality among patients with chronic hepatitis C and advanced hepatic fibrosis. *JAMA* 2012; 308: 2584–2593. <https://doi.org/10.1001/jama.2012.144878> PMID: 23268517
13. European Association for the Study of the Liver. EASL recommendations on treatment of hepatitis C 2018. *J Hepatol* 2018; 69: 461–511. <https://doi.org/10.1016/j.jhep.2018.03.026> PMID: 29650333
14. Vallet-Pichard A1, Mallet V, Nalpas B, Verkarre V, Nalpas A, Dhalluin-Venier V, Fontaine H, Pol S. FIB-4: an inexpensive and accurate marker of fibrosis in HCV infection. comparison with liver biopsy and fibrotest. *Hepatology*. 2007; 46: 32–36. <https://doi.org/10.1002/hep.21669> PMID: 17567829
15. Castéra L1, Vergniol J, Foucher J, Le Bail B, Chanteloup E, Haaser M, et al. Prospective comparison of transient elastography, Fibrotest, APRI, and liver biopsy for the assessment of fibrosis in chronic hepatitis C. *Gastroenterology* 2005; 128: 343–350. PMID: 15685546
16. Chen CH, Yang PM, Huang GT, Lee HS, Sung JL, Sheu JC. Estimation of seroprevalence of hepatitis B virus and hepatitis C virus in Taiwan from a large-scale survey of free hepatitis screening participants. *J Formos Med Assoc* 2007; 106: 148–155. [https://doi.org/10.1016/S0929-6646\(09\)60231-X](https://doi.org/10.1016/S0929-6646(09)60231-X) PMID: 17339159
17. Yang JF, Lin CI, Huang JF, Dai CY, Lin WY, Ho CK, et al. Viral hepatitis infections in southern Taiwan: a multicenter community-based study. *Kaohsiung J Med Sci* 2010; 26: 461–469. [https://doi.org/10.1016/S1607-551X\(10\)70073-5](https://doi.org/10.1016/S1607-551X(10)70073-5) PMID: 20837342
18. Hamaguchi M, Kojima T, Itoh Y, Harano Y, Fujii K, Nakajima T, et al. The severity of ultrasonographic findings in nonalcoholic fatty liver disease reflects the metabolic syndrome and visceral fat accumulation. *Am J Gastroenterol* 2007; 102: 2708–2715. <https://doi.org/10.1111/j.1572-0241.2007.01526.x> PMID: 17894848
19. Olson AP, Trappey B, Wagner M, Newman M, Nixon LJ, Schnobrich D. Point-of-care ultrasonography improves the diagnosis of splenomegaly in hospitalized patients. *Crit Ultrasound J* 2015; 7: 13. <https://doi.org/10.1186/s13089-015-0030-8> PMID: 26383010
20. Cheng PN, Chiu YC, Chiu HC, Chien SC. The application of liver stiffness measurement in residents without overt liver diseases through a community-based screening program. *Medicine* 2016; 95: e3193. <https://doi.org/10.1097/MD.0000000000003193> PMID: 27015215
21. Arena U, Vizzutti F, Corti G, Ambu S, Stasi C, Bresci S, et al. Acute viral hepatitis increases liver stiffness values measured by transient elastography. *Hepatology* 2007; 47: 380–384.
22. Sagir A, Erhardt A, Schmitt M, Häussinger D. Transient elastography is unreliable for detection of cirrhosis in patients with acute liver damage. *Hepatology* 2008; 47:592–595. <https://doi.org/10.1002/hep.22056> PMID: 18098325
23. Siddiqui MS, Vuppalanchi R, Van Natta ML, Hallinan E, Kowdley KV, Abdelmalek M, et al.; NASH Clinical Research Network. Vibration-controlled Transient Elastography to Assess Fibrosis and Steatosis in Patients With Nonalcoholic Fatty Liver Disease. *Clin Gastroenterol Hepatol* 2018. pii: S1542-3565(18)30405-1. <https://doi.org/10.1016/j.cgh.2018.04.043> PMID: 29705261
24. Karlas T, Petroff D, Sasso M, Fan JG, Mi YQ, de Lédinghen V, et al. Impact of controlled attenuation parameter on detecting fibrosis using liver stiffness measurement. *Aliment Pharmacol Ther* 2018; 47: 989–1000. <https://doi.org/10.1111/apt.14529> PMID: 29446106
25. Bloom S, Kemp W, Nicoll A, Roberts SK, Gow P, Dev A, et al. Liver stiffness measurement in the primary care setting detects high rates of advanced fibrosis and predicts liver-related events in hepatitis C. *J Hepatol* 2018; 28. pii: S0168-8278(18)32023-3.
26. Ortiz V, Berenguer M, Rayón JM, Carrasco D, Berenguer J. Contribution of obesity to hepatitis C-related fibrosis progression. *Am J Gastroenterol* 2002; 97:2408–2414. <https://doi.org/10.1111/j.1572-0241.2002.05995.x> PMID: 12358265
27. Adinolfi LE, Gambardella M, Andreana A, Tripodi MF, Utili R, Ruggiero G. Steatosis accelerates the progression of liver damage of chronic hepatitis C patients and correlates with specific HCV genotype and visceral obesity. *Hepatology* 2001; 33:1358–1364. <https://doi.org/10.1053/jhep.2001.24432> PMID: 11391523
28. Shintani Y, Fujie H, Miyoshi H, Tsutsumi T, Tsukamoto K, Kimura S, et al. Hepatitis C virus infection and diabetes: direct involvement of the virus in the development of insulin resistance. *Gastroenterology* 2004; 126:840–848. PMID: 14988838

29. Younossi Z, Negro F, Serfaty L, Pol S, Diago M, Zeuzem S, et al. Homeostasis model assessment of insulin resistance does not seem to predict response to telaprevir in chronic hepatitis C in the REALIZE trial. *Hepatology* 2013; 58:1897–1906. <https://doi.org/10.1002/hep.26437> PMID: 24382638
